# Supplementary material
Source: PubMed Central journal article supplement (PMC3149873)
Supplement: cbt1201_0009SD1.pdf [file cbt1201_0009SD1.pdf]

## Association study stats of RON SNPs and Gastric Cancer

Three analyses were performed on each SNP for each population.

They are chi-square test for group by genotype (2 by 3 table) association, group by allele (2 by 2 table) association, and trend test of propoOnly the European population shows significant ( $p < 0.05$ ) association fall three tests for Exon 20 SNP g16131 and Intron 19 SNP g14694. European population also shows marginally significant ( $p < 0.10$ ) association for althree test for Exon 4 SNP g5205.

Below are details of individual tests arranged by population

( Asian, European, African American) and gene

(g16131 = rs1062633, g5205 = rs2230590, g14694 = rs7627864):

/\*Asian Population, Gene g16131 -AA, AG, GG\*/

1. Chi-square test of group by genotype association

```
+-----+
| Key |
|-----|
| frequency |
| row percentage |
| column percentage |
+-----+
```

| Group  | Genotype Frequency |        |        | Total  |
|--------|--------------------|--------|--------|--------|
|        | AA                 | AG     | GG     |        |
| Normal | 86                 | 31     | 3      | 120    |
|        | 71.67              | 25.83  | 2.50   | 100.00 |
|        | 91.49              | 96.88  | 60.00  | 91.60  |
| Cancer | 8                  | 1      | 2      | 11     |
|        | 72.73              | 9.09   | 18.18  | 100.00 |
|        | 8.51               | 3.13   | 40.00  | 8.40   |
| Total  | 94                 | 32     | 5      | 131    |
|        | 71.76              | 24.43  | 3.82   | 100.00 |
|        | 100.00             | 100.00 | 100.00 | 100.00 |

Pearson chi2(2) = 7.6501 Pr = 0.022

2. Chi-square test of group by allele distribution  
 (The sample size has doubled since each individual contributes a pair of alleles)

```

+-----+
| Key   |
+-----+
|       |
|  frequency  |
|  row percentage  |
|  column percentage  |
+-----+
  
```

| Group  | Allele Frequency |        | Total  |
|--------|------------------|--------|--------|
|        | A                | G      |        |
| Normal | 203              | 37     | 240    |
|        | 84.58            | 15.42  | 100.00 |
|        | 92.27            | 88.10  | 91.60  |
| Cancer | 17               | 5      | 22     |
|        | 77.27            | 22.73  | 100.00 |
|        | 7.73             | 11.90  | 8.40   |
| Total  | 220              | 42     | 262    |
|        | 83.97            | 16.03  | 100.00 |
|        | 100.00           | 100.00 | 100.00 |

Pearson chi2(1) = 0.8001 Pr = 0.371

3. Trend analysis for proportions

Column legend:

r=# patients cancer population  
 nr=# patients normal population  
 \_prop=proportion of cancer patients  
 x=score assigned to genotype group

```

+-----+
| r  nr  _prop  x  |
+-----+
| AA  8  86  0.085  1.00  |
| AG  1  31  0.031  2.00  |
| GG  2   3  0.400  3.00  |
+-----+
  
```

Chi2(1) for trend = 0.732, pr>chi2 = 0.3921

**/\*Asian Population, Gene g5205 -AA, AG, GG\*/**

1. Chi-square test of group by genotype association

| Group  | Genotype Frequency |        |        | Total  |
|--------|--------------------|--------|--------|--------|
|        | AA                 | AG     | GG     |        |
| Normal | 86                 | 31     | 3      | 120    |
|        | 71.67              | 25.83  | 2.50   | 100.00 |
|        | 90.53              | 96.88  | 75.00  | 91.60  |
| Cancer | 9                  | 1      | 1      | 11     |
|        | 81.82              | 9.09   | 9.09   | 100.00 |
|        | 9.47               | 3.13   | 25.00  | 8.40   |
| Total  | 95                 | 32     | 4      | 131    |
|        | 72.52              | 24.43  | 3.05   | 100.00 |
|        | 100.00             | 100.00 | 100.00 | 100.00 |

Pearson chi2(2) = 2.7330 Pr = 0.255

2. Chi-square test of group by allele distribution

| Group  | Allele Frequency |        | Total  |
|--------|------------------|--------|--------|
|        | A                | G      |        |
| Normal | 203              | 37     | 240    |
|        | 84.58            | 15.42  | 100.00 |
|        | 91.44            | 92.50  | 91.60  |
| Cancer | 19               | 3      | 22     |
|        | 86.36            | 13.64  | 100.00 |
|        | 8.56             | 7.50   | 8.40   |
| Total  | 222              | 40     | 262    |
|        | 84.73            | 15.27  | 100.00 |
|        | 100.00           | 100.00 | 100.00 |

Pearson chi2(1) = 0.0494 Pr = 0.824

3. Trend analysis for proportions

|    | r | nr | _prop | x    |
|----|---|----|-------|------|
| AA | 9 | 86 | 0.095 | 1.00 |
| AG | 1 | 31 | 0.031 | 2.00 |
| GG | 1 | 3  | 0.250 | 3.00 |

Chi2(1) for trend = 0.047, pr>chi2 = 0.8288

**/\*Asian Population, Gene g14694 -CC, CG, GG\*/**

1. Chi-square test of group by genotype association

| Group  | Genotype Frequency |        |        | Total  |
|--------|--------------------|--------|--------|--------|
|        | CC                 | CG     | GG     |        |
| Normal | 90                 | 29     | 1      | 120    |
|        | 75.00              | 24.17  | 0.83   | 100.00 |
|        | 89.11              | 100.00 | 100.00 | 91.60  |
| Cancer | 11                 | 0      | 0      | 11     |
|        | 100.00             | 0.00   | 0.00   | 100.00 |
|        | 10.89              | 0.00   | 0.00   | 8.40   |
| Total  | 101                | 29     | 1      | 131    |
|        | 77.10              | 22.14  | 0.76   | 100.00 |
|        | 100.00             | 100.00 | 100.00 | 100.00 |

Pearson chi2(2) = 3.5668 Pr = 0.168

2. Chi-square test of group by allele distribution

| Group  | Allele Frequency |        | Total  |
|--------|------------------|--------|--------|
|        | C                | G      |        |
| Normal | 209              | 31     | 240    |
|        | 87.08            | 12.92  | 100.00 |
|        | 90.48            | 100.00 | 91.60  |
| Cancer | 22               | 0      | 22     |
|        | 100.00           | 0.00   | 100.00 |
|        | 9.52             | 0.00   | 8.40   |
| Total  | 231              | 31     | 262    |
|        | 88.17            | 11.83  | 100.00 |
|        | 100.00           | 100.00 | 100.00 |

Pearson chi2(1) = 3.2230 Pr = 0.073

3. Trend analysis for proportions

|    | r  | nr | _prop | x    |
|----|----|----|-------|------|
| CC | 11 | 90 | 0.109 | 1.00 |
| CG | 0  | 29 | 0.000 | 2.00 |
| GG | 0  | 1  | 0.000 | 3.00 |

Chi2(1) for trend = 3.432, pr>chi2 = 0.0639

**/\*European population, Gene g16131-AA, AG, GG\*/**

1. Chi-square test of group by genotype association

| Group  | Genotype Frequency |        |        | Total  |
|--------|--------------------|--------|--------|--------|
|        | AA                 | AG     | GG     |        |
| Normal | 13                 | 38     | 39     | 90     |
|        | 14.44              | 42.22  | 43.33  | 100.00 |
|        | 61.90              | 84.44  | 88.64  | 81.82  |
| Cancer | 8                  | 7      | 5      | 20     |
|        | 40.00              | 35.00  | 25.00  | 100.00 |
|        | 38.10              | 15.56  | 11.36  | 18.18  |
| Total  | 21                 | 45     | 44     | 110    |
|        | 19.09              | 40.91  | 40.00  | 100.00 |
|        | 100.00             | 100.00 | 100.00 | 100.00 |

Pearson chi2(2) = 7.1815 Pr = **0.028**

2. Chi-square test of group by allele distribution

| Group  | Allele Frequency |        | Total  |
|--------|------------------|--------|--------|
|        | A                | G      |        |
| Normal | 64               | 116    | 180    |
|        | 35.56            | 64.44  | 100.00 |
|        | 73.56            | 87.22  | 81.82  |
| Cancer | 23               | 17     | 40     |
|        | 57.50            | 42.50  | 100.00 |
|        | 26.44            | 12.78  | 18.18  |
| Total  | 87               | 133    | 220    |
|        | 39.55            | 60.45  | 100.00 |
|        | 100.00           | 100.00 | 100.00 |

Pearson chi2(1) = 6.5922 Pr = **0.010**

3. Trend analysis for proportions

|    | r | nr | _prop | x    |
|----|---|----|-------|------|
| AA | 8 | 13 | 0.381 | 1.00 |
| AG | 7 | 38 | 0.156 | 2.00 |
| GG | 5 | 39 | 0.114 | 3.00 |

Chi2(1) for trend = 5.760, pr>chi2 = **0.0164**

**/\*European population, Gene g5205 -AA, AG, GG\*/**

1. Chi-square test of group by genotype association

| Group  | Genotype Frequency |        |        | Total  |
|--------|--------------------|--------|--------|--------|
|        | AA                 | AG     | GG     |        |
| Normal | 15                 | 51     | 24     | 90     |
|        | 16.67              | 56.67  | 26.67  | 100.00 |
|        | 65.22              | 86.44  | 85.71  | 81.82  |
| Cancer | 8                  | 8      | 4      | 20     |
|        | 40.00              | 40.00  | 20.00  | 100.00 |
|        | 34.78              | 13.56  | 14.29  | 18.18  |
| Total  | 23                 | 59     | 28     | 110    |
|        | 20.91              | 53.64  | 25.45  | 100.00 |
|        | 100.00             | 100.00 | 100.00 | 100.00 |

Pearson  $\chi^2(2) = 5.3940$  Pr = 0.067

2. Chi-square test of group by allele distribution

| Group  | Allele Frequency |        | Total  |
|--------|------------------|--------|--------|
|        | A                | G      |        |
| Normal | 81               | 99     | 180    |
|        | 45.00            | 55.00  | 100.00 |
|        | 77.14            | 86.09  | 81.82  |
| Cancer | 24               | 16     | 40     |
|        | 60.00            | 40.00  | 100.00 |
|        | 22.86            | 13.91  | 18.18  |
| Total  | 105              | 115    | 220    |
|        | 47.73            | 52.27  | 100.00 |
|        | 100.00           | 100.00 | 100.00 |

Pearson  $\chi^2(1) = 2.9516$  Pr = 0.086

3. Trend analysis for proportions

|    | r | nr | _prop | x    |
|----|---|----|-------|------|
| AA | 8 | 15 | 0.348 | 1.00 |
| AG | 8 | 51 | 0.136 | 2.00 |
| GG | 4 | 24 | 0.143 | 3.00 |

Chi2(1) for trend = 3.191, pr>chi2 = 0.0741

**/\*European population, Gene g14694 -CC, CG, GG\*/**

1. Chi-square test of group by genotype association

| Group  | Genotype Frequency |        |        | Total  |
|--------|--------------------|--------|--------|--------|
|        | CC                 | CG     | GG     |        |
| Normal | 14                 | 60     | 16     | 90     |
|        | 15.56              | 66.67  | 17.78  | 100.00 |
|        | 60.87              | 86.96  | 88.89  | 81.82  |
| Cancer | 9                  | 9      | 2      | 20     |
|        | 45.00              | 45.00  | 10.00  | 100.00 |
|        | 39.13              | 13.04  | 11.11  | 18.18  |
| Total  | 23                 | 69     | 18     | 110    |
|        | 20.91              | 62.73  | 16.36  | 100.00 |
|        | 100.00             | 100.00 | 100.00 | 100.00 |

Pearson chi2(2) = 8.6146 Pr = **0.013**

2. Chi-square test of group by allele distribution

| Group  | Allele Frequency |        | Total  |
|--------|------------------|--------|--------|
|        | C                | G      |        |
| Normal | 88               | 92     | 180    |
|        | 48.89            | 51.11  | 100.00 |
|        | 76.52            | 87.62  | 81.82  |
| Cancer | 27               | 13     | 40     |
|        | 67.50            | 32.50  | 100.00 |
|        | 23.48            | 12.38  | 18.18  |
| Total  | 115              | 105    | 220    |
|        | 52.27            | 47.73  | 100.00 |
|        | 100.00           | 100.00 | 100.00 |

Pearson chi2(1) = 4.5437 Pr = **0.033**

3. Trend analysis for proportions

|    | r | nr | _prop | x    |
|----|---|----|-------|------|
| CC | 9 | 14 | 0.391 | 1.00 |
| CG | 9 | 60 | 0.130 | 2.00 |
| GG | 2 | 12 | 0.143 | 3.00 |

Chi2(1) for trend = 5.068, pr>chi2 = **0.0244**

**/\*African American, Gene g16131 -AA, AG, GG\*/**

1. Chi-square test of group by genotype association

| Group  | Genotype Frequency |        |        | Total  |
|--------|--------------------|--------|--------|--------|
|        | AA                 | AG     | GG     |        |
| Normal | 15                 | 47     | 28     | 90     |
|        | 16.67              | 52.22  | 31.11  | 100.00 |
|        | 88.24              | 88.68  | 87.50  | 88.24  |
| Cancer | 2                  | 6      | 4      | 12     |
|        | 16.67              | 50.00  | 33.33  | 100.00 |
|        | 11.76              | 11.32  | 12.50  | 11.76  |
| Total  | 17                 | 53     | 32     | 102    |
|        | 16.67              | 51.96  | 31.37  | 100.00 |
|        | 100.00             | 100.00 | 100.00 | 100.00 |

Pearson  $\chi^2(2) = 0.0267$  Pr = 0.987

2. Chi-square test of group by allele distribution

| Group  | Allele Frequency |        | Total  |
|--------|------------------|--------|--------|
|        | A                | G      |        |
| Normal | 77               | 103    | 180    |
|        | 42.78            | 57.22  | 100.00 |
|        | 88.51            | 88.03  | 88.24  |
| Cancer | 10               | 14     | 24     |
|        | 41.67            | 58.33  | 100.00 |
|        | 11.49            | 11.97  | 11.76  |
| Total  | 87               | 117    | 204    |
|        | 42.65            | 57.35  | 100.00 |
|        | 100.00           | 100.00 | 100.00 |

Pearson  $\chi^2(1) = 0.0107$  Pr = 0.918

3. Trend analysis for proportions

|    | r | nr | _prop | x    |
|----|---|----|-------|------|
| 1. | 2 | 15 | 0.118 | 1.00 |
| 2. | 6 | 47 | 0.113 | 2.00 |
| 3. | 4 | 28 | 0.125 | 3.00 |

Chi2(1) for trend = 0.011, pr>chi2 = 0.9150



**/\*African American, Gene g5205 -AA, AG, GG\*/**

1. Chi-square test of group by genotype association

| Group  | Genotype Frequency |        |        | Total  |
|--------|--------------------|--------|--------|--------|
|        | AA                 | AG     | GG     |        |
| Normal | 11                 | 42     | 37     | 90     |
|        | 12.22              | 46.67  | 41.11  | 100.00 |
|        | 91.67              | 84.00  | 92.50  | 88.24  |
| Cancer | 1                  | 8      | 3      | 12     |
|        | 8.33               | 66.67  | 25.00  | 100.00 |
|        | 8.33               | 16.00  | 7.50   | 11.76  |
| Total  | 12                 | 50     | 40     | 102    |
|        | 11.76              | 49.02  | 39.22  | 100.00 |
|        | 100.00             | 100.00 | 100.00 | 100.00 |

Pearson chi2(2) = 1.7009 Pr = 0.427

2. Chi-square test of group by allele distribution

| Group  | Allele Frequency |        | Total  |
|--------|------------------|--------|--------|
|        | A                | G      |        |
| Normal | 64               | 116    | 180    |
|        | 35.56            | 64.44  | 100.00 |
|        | 86.49            | 89.23  | 88.24  |
| Cancer | 10               | 14     | 24     |
|        | 41.67            | 58.33  | 100.00 |
|        | 13.51            | 10.77  | 11.76  |
| Total  | 74               | 130    | 204    |
|        | 36.27            | 63.73  | 100.00 |
|        | 100.00           | 100.00 | 100.00 |

Pearson chi2(1) = 0.3421 Pr = 0.559

3. Trend analysis for proportions

|    | r | nr | _prop | x    |
|----|---|----|-------|------|
| AA | 1 | 11 | 0.083 | 1.00 |
| AG | 8 | 42 | 0.160 | 2.00 |
| GG | 3 | 37 | 0.075 | 3.00 |

Chi2(1) for departure = 1.337, pr>chi2 = 0.2476

**/\*African American, Gene g14694 -CC, CG, GG\*/**

1. Chi-square test of group by genotype association

| Group  | Genotype Frequency |        |        | Total  |
|--------|--------------------|--------|--------|--------|
|        | CC                 | CG     | GG     |        |
| Normal | 58                 | 32     | 0      | 90     |
|        | 64.44              | 35.56  | 0.00   | 100.00 |
|        | 89.23              | 88.89  | 0.00   | 88.24  |
| Cancer | 7                  | 4      | 1      | 12     |
|        | 58.33              | 33.33  | 8.33   | 100.00 |
|        | 10.77              | 11.11  | 100.00 | 11.76  |
| Total  | 65                 | 36     | 1      | 102    |
|        | 63.73              | 35.29  | 0.98   | 100.00 |
|        | 100.00             | 100.00 | 100.00 | 100.00 |

Pearson chi2(2) = 7.5769 Pr = 0.023

2. Chi-square test of group by allele distribution

| Group  | Allele Frequency |        | Total  |
|--------|------------------|--------|--------|
|        | C                | G      |        |
| Normal | 148              | 32     | 180    |
|        | 82.22            | 17.78  | 100.00 |
|        | 89.16            | 84.21  | 88.24  |
| Cancer | 18               | 6      | 24     |
|        | 75.00            | 25.00  | 100.00 |
|        | 10.84            | 15.79  | 11.76  |
| Total  | 166              | 38     | 204    |
|        | 81.37            | 18.63  | 100.00 |
|        | 100.00           | 100.00 | 100.00 |

Pearson chi2(1) = 0.7287 Pr = 0.393

3. Trend analysis for proportions

|    | r | nr | _prop | x    |
|----|---|----|-------|------|
| 1. | 7 | 58 | 0.108 | 1.00 |
| 2. | 4 | 32 | 0.111 | 2.00 |
| 3. | 0 | 1  | 0.000 | 3.00 |

Chi2(1) for trend = 0.004, pr>chi2 = 0.9504
